# Supplementary material for: Faecal haemoglobin distributions by sex, age, deprivation and geographical region: consequences for colorectal cancer screening strategies
Source: publisher site journal article supplement (doi:10.1515/cclm-2020-0268), 2020-04-22
Supplement: Supplementary file 1 [file cclm-2020-0268_suppl.docx]

**Supplementary Table 1. Centiles of faecal haemoglobin concentration (µg Hb/g faeces) for the 11 mainland NHS Boards in Scotland by increasing deprivation by Scottish Index of Multiple Deprivation (SIMD) quintile: 5: least deprived, 1: most deprived**

| **SIMD** | **NHS Board** | **n** | **Centile 90th** | **Centile 95th** | **Centile 97.5th** |
| --- | --- | --- | --- | --- | --- |
|  |  |  |  |  |  |
| 5 | Ayrshire and Arran | 11,510 | 10.0 | 30.3 | 76.6 |
| 4 | Ayrshire and Arran | 11,440 | 11.3 | 34.3 | 98.6 |
| 3 | Ayrshire and Arran | 12,391 | 13.9 | 36.7 | 90.6 |
| 2 | Ayrshire and Arran | 15,440 | 16.6 | 47.9 | 144.8 |
| 1 | Ayrshire and Arran | 15,442 | 20.3 | 57.9 | 169.3 |
|  |  |  |  |  |  |
| 5 | Borders | 2,391 | 9.7 | 29.3 | 75.2 |
| 4 | Borders | 9,467 | 9.2 | 29.6 | 68.4 |
| 3 | Borders | 8,209 | 11.3 | 36.2 | 91.5 |
| 2 | Borders | 3,471 | 12.5 | 35.6 | 84.9 |
| 1 | Borders | 958 | 17.3 | 46.8 | 137.1 |
|  |  |  |  |  |  |
| 5 | Dumfries and Galloway | 3,115 | 7.9 | 22.4 | 55.2 |
| 4 | Dumfries and Galloway | 5,907 | 9.6 | 32.9 | 86.8 |
| 3 | Dumfries and Galloway | 11,750 | 10.5 | 33.4 | 91.3 |
| 2 | Dumfries and Galloway | 7,395 | 13.7 | 37.0 | 94.6 |
| 1 | Dumfries and Galloway | 1,560 | 15.6 | 44.4 | 98.7 |
|  |  |  |  |  |  |
| 5 | Fife | 14,297 | 8.5 | 26.1 | 71.2 |
| 4 | Fife | 12,801 | 9.4 | 28.2 | 71.2 |
| 3 | Fife | 14,189 | 12.3 | 36.7 | 95.3 |
| 2 | Fife | 11,863 | 15.0 | 45.3 | 134.6 |
| 1 | Fife | 9,698 | 19.5 | 59.4 | 168.3 |
|  |  |  |  |  |  |
| 5 | Forth Valley | 12,684 | 9.2 | 28.5 | 70.7 |
| 4 | Forth Valley | 12,071 | 10.9 | 33.0 | 96.0 |
| 3 | Forth Valley | 9,667 | 12.8 | 36.6 | 106.1 |
| 2 | Forth Valley | 11,330 | 16.7 | 47.9 | 125.7 |
| 1 | Forth Valley | 6,259 | 18.8 | 53.8 | 152.7 |
|  |  |  |  |  |  |
| 5 | Grampian | 34,673 | 10.3 | 32.0 | 86.7 |
| 4 | Grampian | 30,574 | 11.3 | 34.5 | 91.9 |
| 3 | Grampian | 17,683 | 13.5 | 41.1 | 100.6 |
| 2 | Grampian | 11,235 | 18.9 | 56.7 | 156.8 |
| 1 | Grampian | 2,699 | 23.6 | 65.6 | 185.0 |
|  |  |  |  |  |  |
| 5 | Greater Glasgow and Clyde | 40,908 | 9.5 | 28.8 | 77.9 |
| 4 | Greater Glasgow and Clyde | 27,245 | 12.5 | 36.0 | 90.3 |
| 3 | Greater Glasgow and Clyde | 23,222 | 15.1 | 46.0 | 114.5 |
| 2 | Greater Glasgow and Clyde | 27,659 | 18.8 | 50.8 | 132.4 |
| 1 | Greater Glasgow and Clyde | 49,670 | 25.6 | 71.0 | 196.0 |
|  |  |  |  |  |  |
| 5 | Highland | 6,409 | 10.1 | 33.3 | 81.8 |
| 4 | Highland | 20,,710 | 11.1 | 32.6 | 79.6 |
| 3 | Highland | 23435 | 12.4 | 37.5 | 96.0 |
| 2 | Highland | 10,539 | 16.7 | 47.6 | 142.3 |
| 1 | Highland | 3,074 | 26.4 | 74.2 | 224.0 |
|  |  |  |  |  |  |
| 5 | Lanarkshire | 14,511 | 11.9 | 34.0 | 83.8 |
| 4 | Lanarkshire | 19,728 | 12.8 | 37.5 | 93.8 |
| 3 | Lanarkshire | 20,696 | 15.7 | 44.2 | 115.1 |
| 2 | Lanarkshire | 27,519 | 18.1 | 50.8 | 134.1 |
| 1 | Lanarkshire | 21,828 | 24.0 | 62.0 | 186.5 |
|  |  |  |  |  |  |
| 5 | Lothian | 47,694 | 8.0 | 25.6 | 67.8 |
| 4 | Lothian | 26,296 | 10.1 | 31.2 | 82.4 |
| 3 | Lothian | 22,174 | 12.7 | 37.8 | 103.8 |
| 2 | Lothian | 23,881 | 16.8 | 48.6 | 130.7 |
| 1 | Lothian | 12,255 | 18.5 | 59.3 | 150.4 |
|  |  |  |  |  |  |
| 5 | Tayside | 15,014 | 9.6 | 31.6 | 84.2 |
| 4 | Tayside | 22,505 | 10.7 | 30.8 | 78.8 |
| 3 | Tayside | 17,249 | 11.2 | 34.6 | 86.3 |
| 2 | Tayside | 8,824 | 15.8 | 44.5 | 123.4 |
| 1 | Tayside | 7,744 | 20.9 | 58.6 | 171.6 |
